# Supplementary material
Source: publisher site journal article supplement (https://static.cambridge.org/content/id/urn:cambridge.org:id:article:S071498082000015X/resource/name/S071498082000015Xsupp001.docx)
Supplement: Supplementary file 1 [file S071498082000015Xsupp001.docx]

Supplementary Figure 1. Priority Setting Survey

Part 1: Please rate each of these major themes in terms of their importance on a scale from 1 (not important at all) to 10 (extremely important).

1. Improve public awareness & support dementia friendly communities 1 2 3 4 5 6 7 8 9 10
2. Promote holistic health & wellness 1 2 3 4 5 6 7 8 9 10
3. Promote patient-centred care 1 2 3 4 5 6 7 8 9 10
4. Improve caregiver support 1 2 3 4 5 6 7 8 9 10
5. Improve access to information & education for patients & caregivers 1 2 3 4 5 6 7 8 9 10
6. Integrate technology into support & management 1 2 3 4 5 6 7 8 9 10
7. Support persons with dementia across the continuum 1 2 3 4 5 6 7 8 9 10
8. Improve access to care 1 2 3 4 5 6 7 8 9 10
9. Promote flexibility of services 1 2 3 4 5 6 7 8 9 10
10. Improve quality across the system of dementia care 1 2 3 4 5 6 7 8 9 10
11. Educate the workforce 1 2 3 4 5 6 7 8 9 10
12. Commit to research and knowledge exchange 1 2 3 4 5 6 7 8 9 10
13. Provide coordinated and integrated care and system navigation support 1 2 3 4 5 6 7 8 9 10

Suggestions for additional major themes: _____________________

Part 2: Please identify the timeframe of implementation for each specific strategy associated with the 13 major themes (options: short term – within 1 year; medium term – 2-4 years; long term – 5+ years). Then, rate each specific strategy in terms of its potential impact on the dementia care system on a scale from 1 (will have no impact) to 10 (will have a very large impact) using the drop down menu.

**Theme 1: Improve public awareness & support dementia-friendly communities**

| Strategy | Timeframe | Impact |
| --- | --- | --- |
| Reduce stigma through awareness campaigns  Develop education tools and resources  Encourage community workshops/discussions  Increase capacity of community organizations to promote awareness of dementia  Increase public awareness about myths and strategies for reducing social isolation of persons with dementia and their caregivers  Support the development of dementia-friendly communities through creating and strengthening partnerships with transportation agencies, financial agencies, the forensic system and other community partners | Short Medium Long  Short Medium Long  Short Medium Long  Short Medium Long  Short Medium Long  Short Medium Long | 1 2 3 4 5 6 7 8 9 10  1 2 3 4 5 6 7 8 9 10  1 2 3 4 5 6 7 8 9 10  1 2 3 4 5 6 7 8 9 10  1 2 3 4 5 6 7 8 9 10  1 2 3 4 5 6 7 8 9 10 |

Additional strategies : _____________________

**Theme 2: Promote holistic health & wellness**

| Strategy | Timeframe | Impact |
| --- | --- | --- |
| Promote brain-healthy lifestyles through physical activity, continuous learning and mental stimulation  Ensure that all care providers and settings consider comorbid conditions as an integral part of a dementia care plan  Build partnerships with fall prevention programs | Short Medium Long  Short Medium Long  Short Medium Long | 1 2 3 4 5 6 7 8 9 10  1 2 3 4 5 6 7 8 9 10  1 2 3 4 5 6 7 8 9 10 |

Additional strategies : _____________________

**Theme 3: Promote patient-centred care**

| Strategy | Timeframe | Impact |
| --- | --- | --- |
| Improve patient-provider and caregiver-provider communication  Actively involve the person with dementia and their informal caregiver in all aspects of care  Promote an awareness that persons with dementia and their caregivers are the experts in care and should inform any improvements  Promote a holistic understanding of the person (culture, ethnicity, religion, literacy, likes, dislikes) in order to tailor interactions appropriately  Ensure that new environments are set up in a way that they are comfortable/familiar to the individual  Ensure that patient goals are identified and prioritized | Short Medium Long  Short Medium Long  Short Medium Long  Short Medium Long  Short Medium Long  Short Medium Long | 1 2 3 4 5 6 7 8 9 10  1 2 3 4 5 6 7 8 9 10  1 2 3 4 5 6 7 8 9 10  1 2 3 4 5 6 7 8 9 10  1 2 3 4 5 6 7 8 9 10  1 2 3 4 5 6 7 8 9 10 |

Additional strategies : _____________________

**Theme 4: Improve caregiver support**

| Strategy | Timeframe | Impact |
| --- | --- | --- |
| Promote awareness and caregiver rights to participate in their care and vocalize concerns to allay fears of speaking up  Develop a catalogue or comprehensive list of services available to informal caregivers  Promote awareness and uptake of services  Support the development of peer support networks to share caregiver strategies  Develop support strategies designed for caregivers in the workforce  Improve provider consideration of the physical and emotional effects of caregiving (e.g., during assessment)  Improve “the compassion that people have for the couple” in the sense that care plans take into consideration effects of decisions and transitions on relationships between persons with dementia and their informal caregivers  Increase access to respite care and home support services and consider the needs of the caregiver upon assessment for qualification and type of respite needed  Provide support for caregiver decision-making as the power of attorney with recognition and consideration of the fact that decisions are difficult  Consider the needs of caregivers throughout the entire journey including after the passing of a loved one with dementia  Improve access and availability of day programs, as a source of social stimulus for persons with dementia and respite for informal caregivers  Promote an understanding of different types of informal care (e.g., spousal, filial, volunteer) and how they might influence the needs of persons with dementia as the move through the system  Introduce flexible workplace policies and income supports for family caregivers | Short Medium Long  Short Medium Long  Short Medium Long  Short Medium Long  Short Medium Long  Short Medium Long  Short Medium Long  Short Medium Long  Short Medium Long  Short Medium Long  Short Medium Long  Short Medium Long  Short Medium Long | 1 2 3 4 5 6 7 8 9 10  1 2 3 4 5 6 7 8 9 10  1 2 3 4 5 6 7 8 9 10  1 2 3 4 5 6 7 8 9 10  1 2 3 4 5 6 7 8 9 10  1 2 3 4 5 6 7 8 9 10  1 2 3 4 5 6 7 8 9 10  1 2 3 4 5 6 7 8 9 10  1 2 3 4 5 6 7 8 9 10  1 2 3 4 5 6 7 8 9 10  1 2 3 4 5 6 7 8 9 10  1 2 3 4 5 6 7 8 9 10  1 2 3 4 5 6 7 8 9 10 |

Additional strategies : _____________________

**Theme 5: Improve access to information & education for patients & caregivers**

| Strategy | Timeframe | Impact |
| --- | --- | --- |
| Promote awareness and caregiver rights to participate in their care and vocalize concerns to allay fears of speaking out  Provide timely and comprehensive information about services available to those who are diagnosed with dementia and their caregivers  Target patient and caregiver education early in the journey in order to help prepare individuals for the decisions and transitions that they may undergo at later stages  Improve awareness of publicly available information among persons with dementia and their caregivers (e.g., CCAC wait time information)  Improve educational resources and information about the health care system and how to access required supports | Short Medium Long  Short Medium Long  Short Medium Long  Short Medium Long  Short Medium Long | 1 2 3 4 5 6 7 8 9 10  1 2 3 4 5 6 7 8 9 10  1 2 3 4 5 6 7 8 9 10  1 2 3 4 5 6 7 8 9 10  1 2 3 4 5 6 7 8 9 10 |

Additional strategies : _____________________

**Theme 6: Integrate technology into support & management**

| Strategy | Timeframe | Impact |
| --- | --- | --- |
| Explore the use of and need for technology in the following areas, such as:  Assessment and follow-up  Patient and caregiver peer support (e.g., for rare dementias/remote areas)  Integration of care  Interdisciplinary team meetings  Provider/administrator education  Patient/caregiver education  System navigation  Self-management  Home safety  Health monitoring  Caregiver respite (e.g., wandering tracking technology)  Promote information and evidence sharing surrounding technological innovations for dementia care  Use social media for networking, engagement and information-sharing | Short Medium Long  Short Medium Long  Short Medium Long  Short Medium Long  Short Medium Long  Short Medium Long  Short Medium Long  Short Medium Long  Short Medium Long  Short Medium Long  Short Medium Long  Short Medium Long  Short Medium Long | 1 2 3 4 5 6 7 8 9 10  1 2 3 4 5 6 7 8 9 10  1 2 3 4 5 6 7 8 9 10  1 2 3 4 5 6 7 8 9 10  1 2 3 4 5 6 7 8 9 10  1 2 3 4 5 6 7 8 9 10  1 2 3 4 5 6 7 8 9 10  1 2 3 4 5 6 7 8 9 10  1 2 3 4 5 6 7 8 9 10  1 2 3 4 5 6 7 8 9 10  1 2 3 4 5 6 7 8 9 10  1 2 3 4 5 6 7 8 9 10  1 2 3 4 5 6 7 8 9 10  1 2 3 4 5 6 7 8 9 10 |

Additional strategies : _____________________

**Theme 7: Support persons with dementia across the continuum**

| Strategy | Timeframe | Impact |
| --- | --- | --- |
| Public education about services and programs available to persons with dementia and caregivers in order to target those who do not yet have a diagnosis, but may be at risk  Ensure support strategies for the transition out of the workforce for persons with dementia  Develop support strategies for persons with early onset dementia  Support and encourage advanced care planning  Provide services, treatment and supports to persons with dementia that are appropriate based on age, stage of the journey and type of dementia  Develop and promote strategies for helping those who deny their diagnosis reach the services that they require  Support persons with dementia and their caregivers through transitions in care  Ensure that end-of-life care is appropriate for persons with dementia (e.g., communication styles, comforts)  Broaden range of palliative care settings for persons with dementia | Short Medium Long  Short Medium Long  Short Medium Long  Short Medium Long  Short Medium Long  Short Medium Long  Short Medium Long  Short Medium Long  Short Medium Long | 1 2 3 4 5 6 7 8 9 10  1 2 3 4 5 6 7 8 9 10  1 2 3 4 5 6 7 8 9 10  1 2 3 4 5 6 7 8 9 10  1 2 3 4 5 6 7 8 9 10  1 2 3 4 5 6 7 8 9 10  1 2 3 4 5 6 7 8 9 10  1 2 3 4 5 6 7 8 9 10  1 2 3 4 5 6 7 8 9 10 |

Additional strategies : _____________________

**Theme 8: Improve access to care**

| Strategy | Timeframe | Impact |
| --- | --- | --- |
| Reduce wait times for diagnosis  Provide access to the right combination of services, treatment and supports when and where people need them  Increase awareness of available services through several media to ensure appropriate dissemination to different groups (e.g., websites, print material, videos)  Reduce disparity in access to services and strengthen the response to needs of diverse communities  Improve supports for immigrants, refugees, ethno-cultural groups and Aboriginal communities  Support access to primary care  Increase access to specialized services  Ensure availability and awareness of services in all regions of the LHIN (e.g., county-specific lists of services for persons with dementia and caregivers) | Short Medium Long  Short Medium Long  Short Medium Long  Short Medium Long  Short Medium Long  Short Medium Long  Short Medium Long  Short Medium Long | 1 2 3 4 5 6 7 8 9 10  1 2 3 4 5 6 7 8 9 10  1 2 3 4 5 6 7 8 9 10  1 2 3 4 5 6 7 8 9 10  1 2 3 4 5 6 7 8 9 10  1 2 3 4 5 6 7 8 9 10  1 2 3 4 5 6 7 8 9 10  1 2 3 4 5 6 7 8 9 10 |

Additional strategies : _____________________

**Theme 9: Promote flexibility of services**

| Strategy | Timeframe | Impact |
| --- | --- | --- |
| Encourage flexibility in referral processes (e.g., referrals that come from the person/organization in the system that knows the patient’s case best, which may not be a physician)  Allow for flexibility in “double-dipping” rules; e.g., for persons with dementia transitioning into long-term care could benefit from a continued connection with day programs with which they are accustomed to and comfortable | Short Medium Long  Short Medium Long | 1 2 3 4 5 6 7 8 9 10  1 2 3 4 5 6 7 8 9 10 |

Additional strategies : _____________________

**Theme 10: Improve quality across the system of care**

| Strategy | Timeframe | Impact |
| --- | --- | --- |
| **Hospital**  Dementia-friendly hospital principles through accountability agreements with hospitals  Promote understanding of the needs of persons with dementia when their primary caregiver is admitted to hospital  Promote understanding of the needs of informal caregivers when a person with dementia is in hospital  **Primary Care**  Provide tools, resources and support to primary care providers to encourage timely diagnosis and practitioner confidence in diagnosis  Expand the role of primary health care in the management of dementia (e.g., expand memory clinic model)  Improve linkages between primary care and community supports (e.g., First Link, Alzheimer Outreach Services of McCormick Home) and specialized services (e.g., Regional Mental Health)  **Long-term care (LTC)**  Enhance LTC environments for persons with dementia  Ensure consistent high quality of LTC  **Regional mental health**  Support appropriate use of regional mental health resources  **Community supports**  Increase support for home and community-based services to meet the higher demand created by increased referrals and the goal of keeping persons with dementia at home as long as possible | Short Medium Long  Short Medium Long  Short Medium Long  Short Medium Long  Short Medium Long  Short Medium Long  Short Medium Long  Short Medium Long  Short Medium Long  Short Medium Long | 1 2 3 4 5 6 7 8 9 10  1 2 3 4 5 6 7 8 9 10  1 2 3 4 5 6 7 8 9 10  1 2 3 4 5 6 7 8 9 10  1 2 3 4 5 6 7 8 9 10  1 2 3 4 5 6 7 8 9 10  1 2 3 4 5 6 7 8 9 10  1 2 3 4 5 6 7 8 9 10  1 2 3 4 5 6 7 8 9 10  1 2 3 4 5 6 7 8 9 10 |

Additional strategies : _____________________

**Theme 11: Educate the workforce**

| Strategy | Timeframe | Impact |
| --- | --- | --- |
| Create and provide high-quality information and educational programs to health care providers  Strengthen dementia-specific training across the health and social services sectors to ensure consistency in care quality  Ensure dementia training that includes knowledge of services and best-practices for caring for persons with different types of dementia and at different stages of dementia  Promote physician awareness of community resources for persons with dementia and their informal caregivers  Educate physicians on referral processes (how & when to refer)  Use several modes of communication to ensure appropriate educational models for different groups (e.g., books, materials, videos, websites)  Improve education in cultural competency  Improve dementia training for health care providers being trained in colleges and universities  Incorporate/provide training for front-line staff on elder abuse | Short Medium Long  Short Medium Long  Short Medium Long  Short Medium Long  Short Medium Long  Short Medium Long  Short Medium Long  Short Medium Long  Short Medium Long | 1 2 3 4 5 6 7 8 9 10  1 2 3 4 5 6 7 8 9 10  1 2 3 4 5 6 7 8 9 10  1 2 3 4 5 6 7 8 9 10  1 2 3 4 5 6 7 8 9 10  1 2 3 4 5 6 7 8 9 10  1 2 3 4 5 6 7 8 9 10  1 2 3 4 5 6 7 8 9 10  1 2 3 4 5 6 7 8 9 10 |

Additional strategies : _____________________

**Theme 12: Commit to research and knowledge exchange**

| Strategy | Timeframe | Impact |
| --- | --- | --- |
| Develop and promote research and knowledge exchange networks  Provide funding and recruit new researchers who are dedicated to examining the cause, cure, care and prevention of dementia  Invest in interdisciplinary research  Expand the leadership role of people living with dementia and their informal caregivers in research and dementia-related policy (e.g., inclusion on research groups and planning committees)  Accelerate findings into practice  Provide accessible information to the public on results of research initiatives  Identify best practice models for dementia through research, knowledge syntheses and consensus conferences | Short Medium Long  Short Medium Long  Short Medium Long  Short Medium Long  Short Medium Long  Short Medium Long  Short Medium Long | 1 2 3 4 5 6 7 8 9 10  1 2 3 4 5 6 7 8 9 10  1 2 3 4 5 6 7 8 9 10  1 2 3 4 5 6 7 8 9 10  1 2 3 4 5 6 7 8 9 10  1 2 3 4 5 6 7 8 9 10  1 2 3 4 5 6 7 8 9 10 |

Additional strategies : _____________________

**Theme 13: Prove coordinated and integrated care and system navigation support**

| Strategy | Timeframe | Impact |
| --- | --- | --- |
| Formalize a standardized collaborative care model  Build collective capacity of organizations to address dementia needs by encouraging collaboration and integration of community partners that provide similar or related services  Formalize linkages between services to ensure integration  Capitalize on existing initiates (e.g., BSO, Health Links, Geriatric Cooperatives, First Link, Memory Clinics Model)  Encourage collaboration and integration of community partners that provide similar services  Formalize linkages between services to ensure integration  Capitalize on existing initiatives that support integration (e.g., BSO, Health Links, Geriatric Cooperatives, First Link, Memory Clinics Model)  Improve availability and access to resources that help persons with dementia and their caregivers determine where to go and who to ask in order to address their needs (e.g., improve awareness of Senior’s Scene documents, Alzheimer Society resources)  Ensure that roles of providers are clearly described to persons with dementia and their caregivers  Expand models of care that encourage care coordination (e.g., Rural Geriatric Glue)  For people with dementia, change and inconsistency can be significant stressors; therefore, provider consistency should be ensured wherever possible (e.g., giving people the option to request the same PSW from CCAC)  Implement models of care that recognize the importance of having a member of the care team act as a hub so that people with dementia and their caregivers know that they can contact a specific person to gain access to care information | Short Medium Long  Short Medium Long  Short Medium Long  Short Medium Long  Short Medium Long  Short Medium Long  Short Medium Long  Short Medium Long  Short Medium Long  Short Medium Long  Short Medium Long  Short Medium Long | 1 2 3 4 5 6 7 8 9 10  1 2 3 4 5 6 7 8 9 10  1 2 3 4 5 6 7 8 9 10  1 2 3 4 5 6 7 8 9 10  1 2 3 4 5 6 7 8 9 10  1 2 3 4 5 6 7 8 9 10  1 2 3 4 5 6 7 8 9 10  1 2 3 4 5 6 7 8 9 10  1 2 3 4 5 6 7 8 9 10  1 2 3 4 5 6 7 8 9 10  1 2 3 4 5 6 7 8 9 10  1 2 3 4 5 6 7 8 9 10 |
